# Supplementary material for: Green fabrication of magnetic recoverable graphene/MnFe2O4hybrids for efficient decomposition of methylene blue and the Mn/Fe redox synergetic mechanism
Source: Royal Society of Chemistry journal article supplement (doi:10.1039/c6ra24320g), 2016-01-01
Supplement: c6ra24320g1.pdf [file c6ra24320g1.pdf]

## Supporting Information

### Green fabrication of magnetic recoverable graphene/MnFe<sub>2</sub>O<sub>4</sub> hybrids for efficient decomposition of methylene blue and the Mn/Fe redox synergetic mechanism

Xiyue Peng,<sup>a</sup> Jiangying Qu,<sup>a,b\*</sup> Shuo Tian,<sup>a</sup> Yanwei Ding,<sup>a</sup> Xi Hai,<sup>a</sup> Bo Jiang,<sup>c</sup> Mingbo Wu,<sup>c\*</sup> and Jieshan Qiu<sup>b</sup>

<sup>a</sup> Faculty of Chemistry and Chemical Engineering, Liaoning Normal University, Dalian, 116029, China

<sup>b</sup> Carbon Research Laboratory, Center for Nano Materials and Science, School of Chemical Engineering, State Key Lab of Fine Chemicals, Dalian University of Technology, Dalian, 116024, China

<sup>c</sup> State Key Laboratory of Heavy Oil Processing, School of Chemical Engineering, China University of Petroleum, Qingdao, 266580, China

#### Sp1. Test of the catalytic activity

The catalytic performances of as-synthesized RGO/MnFe<sub>2</sub>O<sub>4</sub> composites were investigated in 50 mL glass beakers with RGO and MnFe<sub>2</sub>O<sub>4</sub> as reference. In a typical run, 5 mg of catalyst was added to the solution containing 10 mL of MB dye solution (50 mg L<sup>-1</sup>) as well as 5 mL of H<sub>2</sub>O<sub>2</sub> (30 wt%) solution, and evenly reacted under room temperature with continuous stirring. For a given time interval, 4 mL of the suspension was magnetically separated so as to get supernatant liquid. Afterwards, the

---

\*Corresponding author: Tel: +86-411-82158329. E-mail address: qujy@lnnu.edu.cn (J. Qu); Tel: +86-532-86983452. E-mail: wumb@upc.edu.cn (M. Wu).

concentration of MB dye in separated supernatant liquid was determined by UV-vis spectroscopy at 664 nm. Furthermore, in the stability tests of RGO/MnFe<sub>2</sub>O<sub>4</sub>-75, the catalyst was magnetically separated, washed, dried, and reused in a fresh solution of MB and H<sub>2</sub>O<sub>2</sub> after completion of the reaction. Finally, the sample named as RGO/MnFe<sub>2</sub>O<sub>4</sub>-75-R was collected for further characterization.

### **Sp2. Analysis of hydroxyl radical (•OH)**

The generated active hydroxyl radicals (•OH) were detected by using terephthalic acid (TA) as the probe molecule to evaluate the catalytic properties of the RGO/MnFe<sub>2</sub>O<sub>4</sub> composites. Typically, the aqueous solution (25 mL) which involved  $5 \times 10^{-4}$  mol L<sup>-1</sup> of TA and  $2 \times 10^{-3}$  mol L<sup>-1</sup> of NaOH was prepared. Subsequently, 5 mg of RGO/MnFe<sub>2</sub>O<sub>4</sub> was dispersed in the mixture and followed by adding 5 mL of 30 wt% H<sub>2</sub>O<sub>2</sub> solution to the mixture. The reactions were carried out under continuous stirring at room temperature. At a fixed interval, the catalyst was separated from the solution with a magnet and 5 mL of the supernatant was used for fluorescence spectrum measurements. After being excited by 325 nm light, the photoluminescence (PL) spectra of the generated 2-hydroxyterephthalic acid were measured at 446 nm.

### **Sp3. XRD pattern of K<sub>2</sub>SO<sub>4</sub> by-product**

Fig. S1 shows XRD pattern of the K<sub>2</sub>SO<sub>4</sub> by-product collected after the synthesis of experimental 2.1. It is observed that the diffraction peaks including (020), (111), (002), (022), (130), (040), (013), (212), (141), (042), (004), (060) of the obtained product match well with the result of the reported K<sub>2</sub>SO<sub>4</sub> (JCPDS NO. 05-0613), indicating that K<sub>2</sub>SO<sub>4</sub> obtained from this process is of high purity.

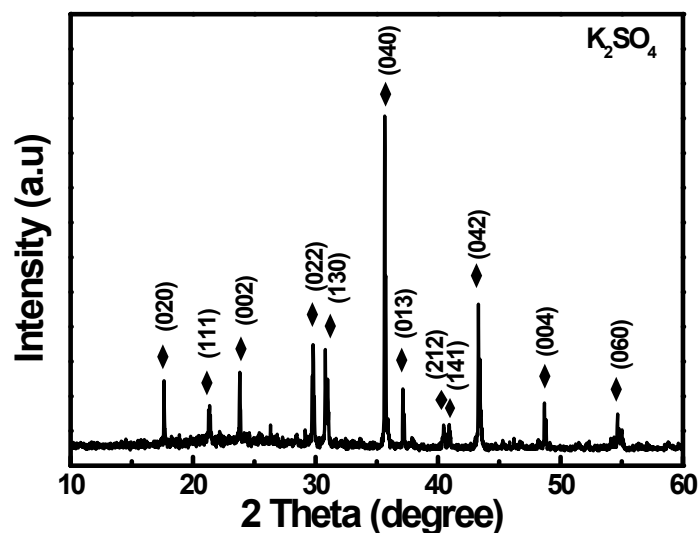

Fig. S1 XRD pattern of the recycled by-product  $K_2SO_4$ .

#### Sp4. Preparation of $Fe_2O_3$ , $Mn_3O_4$ and $MnO$

Typically,  $Fe_2O_3$  was synthesized via the following steps. First, 1.4 g  $Fe(NO)_3 \cdot 9H_2O$  and 0.6g KOH were successively dissolved in 15 mL deionized water under magnetic stirring for 0.5 h. Then, the obtained mixture was placed in a 20 mL Teflon-lined autoclave at 150 °C for 15 h. Finally, the red precipitate was collected by filtration, washed thoroughly with distilled water, and fully dried at 80 °C over night.

$Mn_3O_4$  was synthesized with the similar method described in the references <sup>1, 2</sup>. In a typical synthesis, 10 mL of the homogeneous GO/ $MnSO_4$  suspension from modified Hummers method was firstly centrifuged at 8000rpm to get supernatant liquid which contains  $MnSO_4$  (0.22 mol  $L^{-1}$ ). Then 10 mL of KOH (2 mol  $L^{-1}$ ) solution was added with sufficient oxygen assistance. The system was continuously stirred until the pH value of the suspension reached 12. Finally, the black precipitate was collected by

filtration, washed thoroughly to neutral with distilled water, and fully dried at 80 °C over night.

The MnO was prepared by annealing the above obtained Mn<sub>3</sub>O<sub>4</sub> at 500 °C in H<sub>2</sub>/Ar (1:9) flow for 4h with the ramp rate of 5 °C.

#### **Sp5. XPS spectra of the cycled RGO/MnFe<sub>2</sub>O<sub>4</sub>-75-R**

To check the variation of the surface chemical properties of the recycled catalyst after Fenton reaction, XPS spectra of the cycled RGO/MnFe<sub>2</sub>O<sub>4</sub>-75-R were further recorded, as shown in Fig. S2 (a-b). Comparing to the Mn 2p and Fe 2p in Fig. 3 (b - c), the recycled RGO/MnFe<sub>2</sub>O<sub>4</sub>-75 hybrid exists the same peaks with the fresh one. However, there are some slight differences of the binding energy values of Fe 2p as well as Mn 2p before and after Fenton reaction. As shown in table S1, most peaks of RGO/MnFe<sub>2</sub>O<sub>4</sub>-75-R shift to lower binding energy values compared with that of the fresh ones. Besides, the full widths at half maximum (FWHM) of the corresponding peaks are broadened and the detailed comparisons of FWHM can be observed in table S2. Such differences may be attributed to the electron transfer of Fe<sup>3+</sup>/Fe<sup>2+</sup> and Mn<sup>3+</sup>/Mn<sup>2+</sup> in the catalytic process.

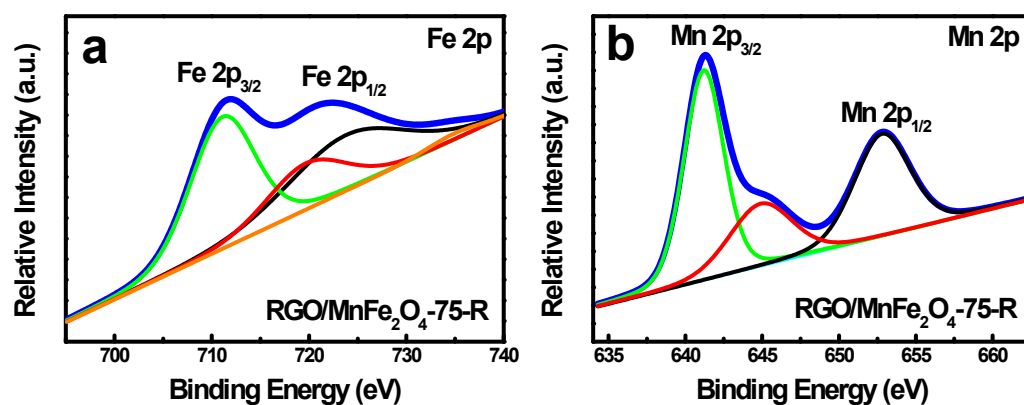

Fig. S2 (a-b) XPS spectra of Fe 2p and Mn 2p regions of RGO/MnFe<sub>2</sub>O<sub>4</sub>-75-R.

**Table S1**

Comparisons between Fe 2p and Mn 2p binding energies before and after catalytic reaction.

|              | Peaks                     | Before catalytic reaction | After catalytic reaction |
|--------------|---------------------------|---------------------------|--------------------------|
| <b>Mn 2p</b> | Mn 2p <sub>3/2</sub> (eV) | 641.2                     | 640.7                    |
|              | Mn 2p <sub>1/2</sub> (eV) | 652.8                     | 652.5                    |
|              | Satellite peak (eV)       | 644.9                     | 644.2                    |
| <b>Fe 2p</b> | Fe 2p <sub>3/2</sub> (eV) | 711.3                     | 711.1                    |
|              | Fe 2p <sub>1/2</sub> (eV) | 725.1                     | 723.8                    |
|              | Satellite peak (eV)       | 719.8                     | 719.7                    |
|              | Satellite peak (eV)       | 733.3                     | 734.8                    |

**Table S2**

FWHM values for Mn2p and Fe 2p binding energies before and after catalytic reaction.

|              | Peaks                     | Before catalytic reaction | After catalytic reaction |
|--------------|---------------------------|---------------------------|--------------------------|
| <b>Mn 2p</b> | Mn 2p <sub>3/2</sub> (eV) | 3.06                      | 3.26                     |
|              | Mn 2p <sub>1/2</sub> (eV) | 4.30                      | 5.50                     |
| <b>Fe 2p</b> | Fe 2p <sub>3/2</sub> (eV) | 4.36                      | 7.88                     |
|              | Fe 2p <sub>1/2</sub> (eV) | 3.10                      | 14.21                    |

### Sp6. H<sub>2</sub>-TPR measurement

H<sub>2</sub>-TPR measurement was further applied to investigate the oxidation state of Mn and Fe in the MnFe<sub>2</sub>O<sub>4</sub> catalyst with Mn<sub>3</sub>O<sub>4</sub> and Fe<sub>2</sub>O<sub>3</sub> as the references. The TPR experiments of the obtained samples were carried out in H<sub>2</sub> flow by linearly raising the temperature to 700 °C and the results were shown in Fig. S3. It's noted that all the samples present two peaks in the tested regions. Typically, one peak of Mn<sub>3</sub>O<sub>4</sub> located at 300~400 °C region can be assigned to the reduction of Mn<sup>3+</sup> (Mn<sub>3</sub>O<sub>4</sub>) to Mn<sup>2+</sup> (MnO) <sup>2</sup>. Similarly, the corresponding peaks of Fe<sub>2</sub>O<sub>3</sub> centered at 388 and 544 °C result from the reduction process of Fe<sub>2</sub>O<sub>3</sub> (Fe<sup>3+</sup>) are related to the formation Fe<sub>3</sub>O<sub>4</sub> (Fe<sup>3+</sup> and Fe<sup>2+</sup>) and FeO (Fe<sup>2+</sup>), respectively <sup>3</sup>. Besides, the reduction step of Fe<sup>3+</sup> to Fe<sup>2+</sup> starts at a higher temperature (320 °C) comparing with that of Mn<sup>3+</sup> to Mn<sup>2+</sup> (210 °C). This observation suggests that Mn<sup>3+</sup>/Mn<sup>2+</sup> presents higher oxidation capacity than Fe<sup>3+</sup>/Fe<sup>2+</sup>, which is in agreement the reaction described in Eqs. (5). As for MnFe<sub>2</sub>O<sub>4</sub> sample, the first peak centered at 432 °C is responsible to the reduction process of MnFe<sub>2</sub>O<sub>4</sub> to both MnO and Fe<sub>3</sub>O<sub>4</sub>. The second one located at 544 °C is attributed to

the similar reduction of iron species in  $\text{Fe}_2\text{O}_3$  system (from  $\text{Fe}_3\text{O}_4$  to  $\text{FeO}$ ). Such result is in good agreement with the  $\text{Fe}^{3+}/\text{Fe}^{2+}$  and  $\text{Mn}^{3+}/\text{Mn}^{2+}$  redox couples that described in the XPS results and provides further evidence to the mechanism.

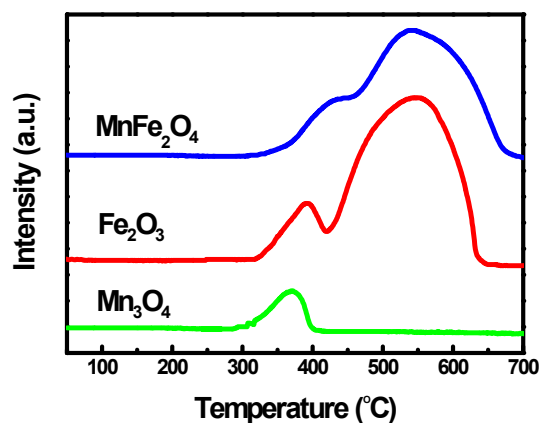

Fig. S3 H<sub>2</sub>-TPR spectra of  $\text{MnFe}_2\text{O}_4$ ,  $\text{Mn}_3\text{O}_4$  and  $\text{Fe}_2\text{O}_3$  samples.

## References

1. F. Gao, J. Qu, Z. Zhao, Y. Dong, J. Yang, Q. Dong and J. Qiu, *Carbon* 2014, **29**, 316-321.
2. Y. Li, J. Qu, F. Gao, S. Lv, L. Shi, C. He and J. Sun, *Applied Catalysis B: Environmental*, 2015, **162**, 268-274.
3. Y. Wang, H. Zhao, M. Li, J. Fan and G. Zhao, *Applied Catalysis B: Environmental*, 2014, **147**, 534-545.
